# Supplementary material for: Dynamic light scattering as an efficient tool to study glyconanoparticle–lectin interactions
Source: Royal Society of Chemistry journal article supplement (doi:10.1039/c1an15469a), 2011-01-01
Supplement: c1an15469a.pdf [file c1an15469a.pdf]

## Supplementary Information

### Dynamic Light Scattering as Efficient Tool to Study Glyconanoparticle-Lectin Interactions

Xin Wang<sup>1</sup>, Olof Ramström<sup>2,\*</sup>, Mingdi Yan<sup>1,2\*</sup>

<sup>1</sup>Department of Chemistry, Portland State University, P.O. Box 751, Portland, Oregon, 97207-0751; <sup>2</sup>Department of Chemistry, KTH - Royal Institute of Technology, Teknikringen 30, S-10044 Stockholm, Sweden

#### Table of Contents

1. TEM and DLS of 40 nm Au NPs
2. LOD of **Au-M-GNP** with Con A
3. DLS of 35 nm, 110 nm, and 470 nm silica particles
4. LOD of **S-G-GNP** with RCA<sub>120</sub>
5. K<sub>D</sub> of **Au-M-GNP** with Con A and **S-G-GNP** with RCA<sub>120</sub>

### 1. TEM and DLS of 40 nm Au NPs

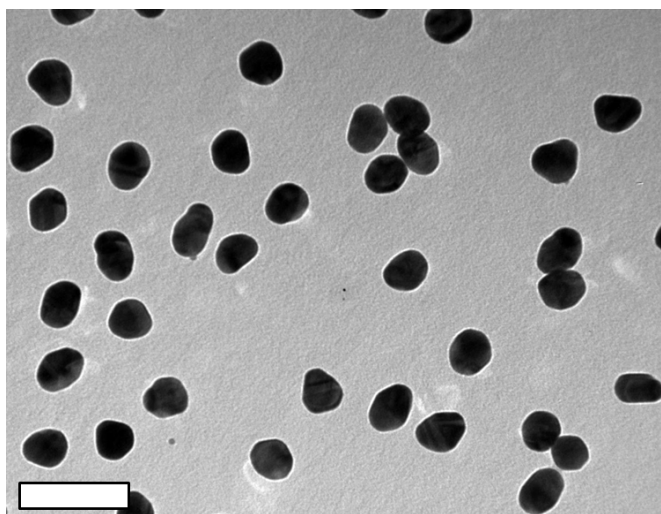

Fig. 1S TEM image of Au NPs (scale bar: 100 nm).

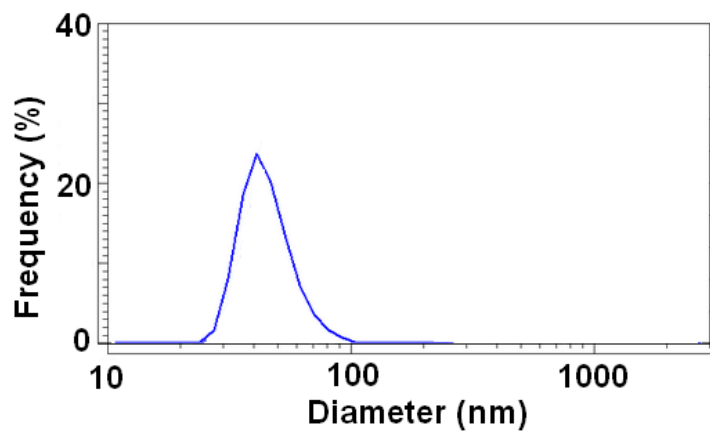

Fig. 2S DLS size distribution of Au NPs.

## 2. LOD of Au-M-GNP with Con A

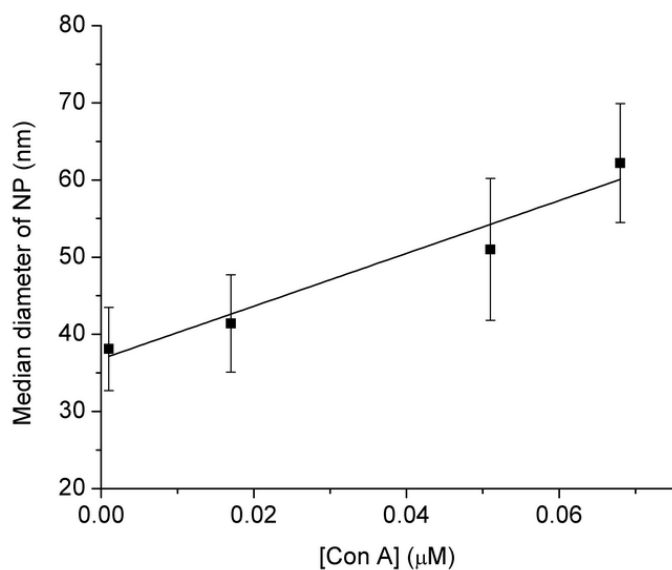

**Fig. 3S** Dynamic linear range of median diameter of **Au-M-GNP** vs. Con A concentration, from which the LOD was determined to be 15 nM according to Eq. 1 (see article text).

## 3. DLS of 35 nm, 110 nm, 470 nm silica particles

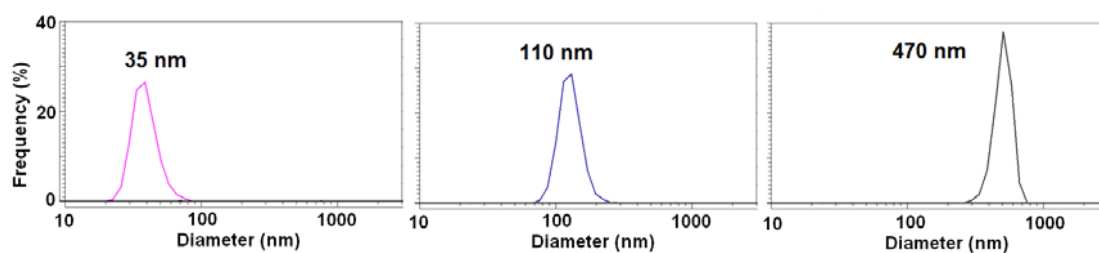

**Fig. 4S** DLS particle size distribution of synthesized silica particles.

#### 4. LOD of S-G-GNP with RCA<sub>120</sub>

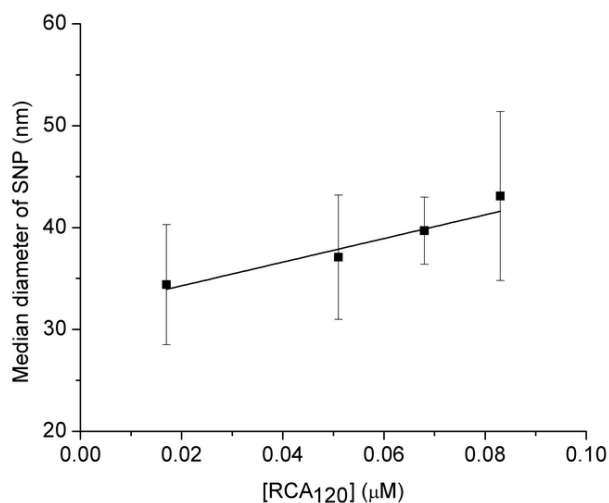

**Fig. 5S** Dynamic linear range of median diameter of **S-G-GNP** vs. RCA<sub>120</sub> concentration, from which the LOD was determined to be 6.6 nM according to Eq. 1 (see article text).

#### 5. Saturation curves of S-G-GNP with RCA<sub>120</sub> and Au-M-GNP with Con A

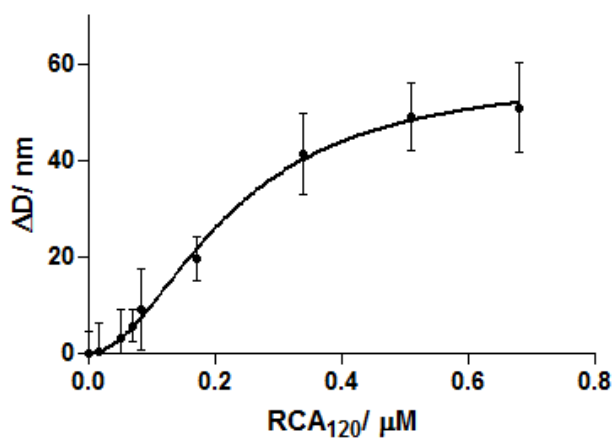

**Fig. 6S** The change in particle diameter ( $\Delta D$ ) of **S-G-GNP** vs. RCA<sub>120</sub> concentration: experimental data (solid circles) and the corresponding Hill fitting curve (line).

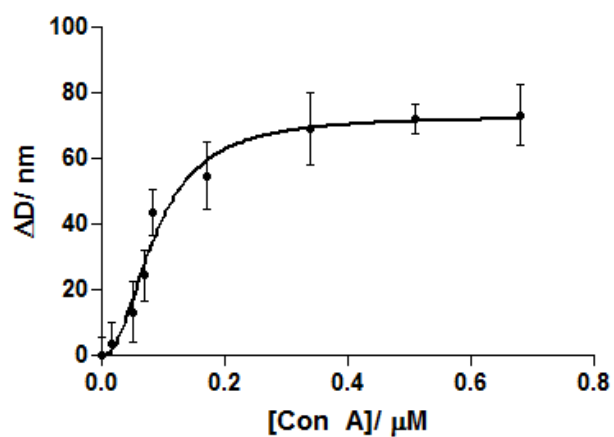

**Fig. 7S** The change in particle diameter ( $\Delta D$ ) of **Au-M-GNP** vs. Con A concentration: experimental data (solid circles) and the corresponding Hill fitting curve (line).
